# Supplementary material for: Metastable iron(iii) oxide polymorphs derived from Fe/Mn bimetallic coordination polymer particles in confined space: SiO2 shell effect on crystal phase transition
Source: Royal Society of Chemistry journal article supplement (doi:10.1039/c9ce00191c), 2019-01-01
Supplement: c9ce00191c1.pdf [file c9ce00191c1.pdf]

Supporting Information for

**Metastable Iron(III) Oxides Polymorph derived from  
Fe/Mn Bimetallic Coordination Polymer Particles in  
Confined Space: SiO<sub>2</sub> Shell Effect on Crystal Phase  
Transition**

Junhyung Lee\*

Korea Transformer Co., Ltd., 415, Siheung Dae-ro, Geumcheon-gu, Seoul 08523, Korea

## Materials and Instrumentation

All chemicals obtained from commercial resources that were used without further purification. The morphologies and particle shapes of synthesized materials was investigated by field-emission scanning electron microscopy (FE-SEM, Carl Zeiss SUPRA 55VP), operated at an accelerating voltage of 3.0 kV and equipped with energy-dispersive spectroscopy (EDS) capabilities. All scanning and high-resolution transmission electron microscopy (STEM and HR-TEM respectively) images and electron diffraction (ED) patterns were obtained using a JEOL JEM-2000EXII and JEM-ARM200F instruments operated at 200 kV. X-ray diffraction studies for the crystal structure were conducted using a XRD equipped with a Cu-K $\alpha$  radiation (50kV, 100 mA,  $\lambda = 1.541\text{\AA}$ ) at room temperature. Thermogravimetric analysis (TGA) was carried out on a TA Instruments Q500 at up to 800 °C with a heating rate of 10 °C under air. The field-dependent magnetization of each sample was measured ranging from -15 to 15 kOe using a Lake Shore 7410 vibrating sample magnetometer (VSM). The synthesis of FeMn bimetallic coordination polymer particles (FeMn(fur)) were carried out following the reported literature with the modification.<sup>1</sup>

### Synthesis of SiO<sub>2</sub> coated FeMn(fur) particles

A precursor solution was prepared by dispersion of FeMn(fur) particles (2.4 g) in a mixture of water (40 mL) and ethanol (160 mL). 6 mL of an aqueous ammonia solution was added into the mixed solution. After stirring for 10 min, 1 mL of tetraethyl orthosilicate (TEOS) in 10 mL of ethanol was added dropwise to the reaction mixture. The mixture was stirred at 60 °C for 2 hr. The final brown precipitates were isolated by filtration and then washed with deionized water, ethanol, and acetone several times.

### Preparation of manganese doped $\beta$ -Fe<sub>2</sub>O<sub>3</sub> hollow silica (FeMn@SiO<sub>2</sub>-500)

SiO<sub>2</sub> coated FeMn(fur) particles were moved in ceramic boats and then moved into a furnace. The FeMn(fur)@SiO<sub>2</sub> particles were calcinated at 500, 700, 800, 900 and 1000 °C under air atmosphere with a heating rate of 5 °C /min and then naturally cooled down to room temperature. Hereafter, the prepared products are called FeMn@SiO<sub>2</sub>-X, where X indicates the calcination temperature.

### Preparation of manganese doped amorphous iron oxides

Mn-doped  $\beta$ -Fe<sub>2</sub>O<sub>3</sub>@SiO<sub>2</sub> (FeMn@SiO<sub>2</sub>-500) particles were immersed in 1M of NaOH solution and then were sonicated for 2h at 60 °C. The products were washed with deionized water and ethanol by centrifugation to remove residues.

### Preparation of manganese doped mixed Fe<sub>2</sub>O<sub>3</sub> (FeMn-500)

FeMn-MOFs were placed in ceramic boats and then moved into a furnace. The products were prepared via thermal treatment at 500 °C under air atmosphere with a heating rate of 5 °C /min and then naturally cooled down to room temperature.

### Preparation of manganese doped $\alpha$ -Fe<sub>2</sub>O<sub>3</sub> (NH<sub>4</sub>OH-FeMn-500)

FeMn(fur) particles (2.4g) were dispersed in a mixture of deionized water (40 mL) and ethanol (160 mL). 6 mL of an aqueous ammonia solution was added into the mixed solution and then stirred at 60 °C for 2 hr. Aqueous ammonia solution treated FeMn(fur) particles were isolated by filtration and then washed with deionized water, ethanol and acetone 2 times and then dried. The precipitates were calcined at 500 °C under air atmosphere with a heating rate of 5 °C /min and then naturally cooled down to room temperature.

## Results and Discussion

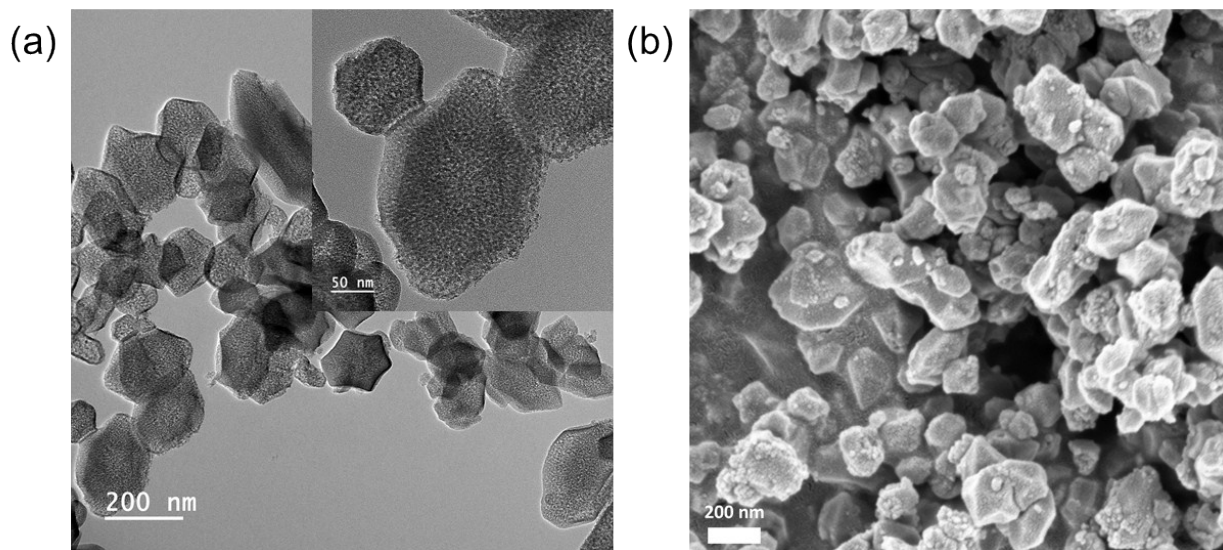

Fig. S1. (a) TEM and (b) SEM images of FeMn(fur)@SiO<sub>2</sub> particles

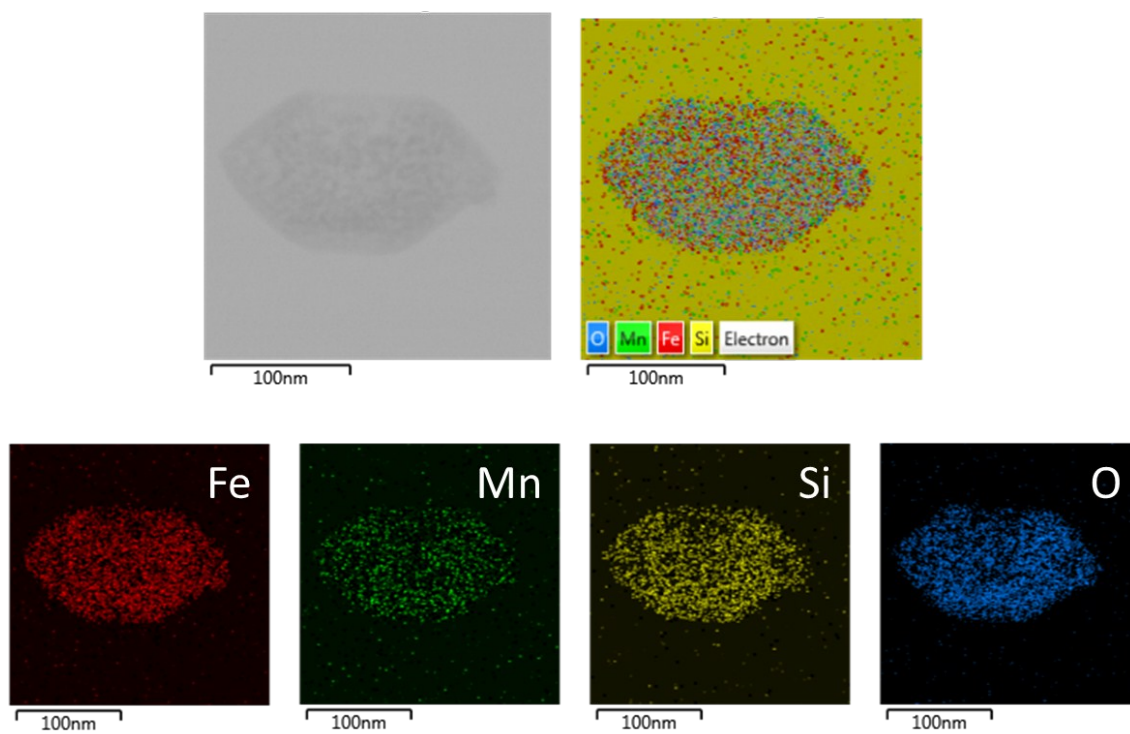

Fig. S2. The scanning transmission electron microscopy (STEM)-EDS maps showing the distribution of Fe, Mn, Si and O of FeMn(fur)@SiO<sub>2</sub> particles.

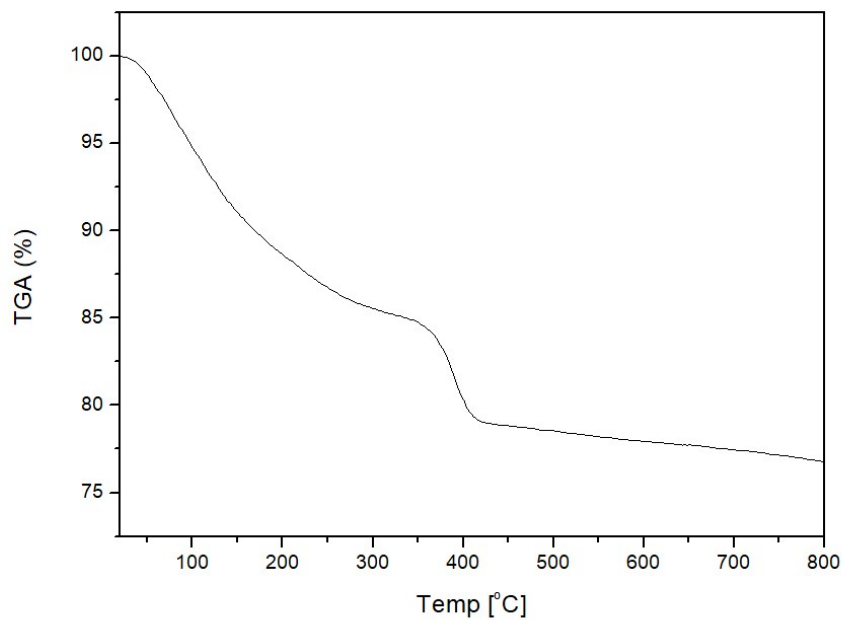

**Fig. S3.** TGA curve of FeMn(fur)@SiO<sub>2</sub>

|                     | $\alpha$ -Fe <sub>2</sub> O <sub>3</sub> | $\beta$ -Fe <sub>2</sub> O <sub>3</sub> | $\gamma$ -Fe <sub>2</sub> O <sub>3</sub> | $\epsilon$ -Fe <sub>2</sub> O <sub>3</sub> |
|---------------------|------------------------------------------|-----------------------------------------|------------------------------------------|--------------------------------------------|
| Crystal System      | Rhombohedral                             | Cubic                                   | Tetragonal                               | Monoclinic                                 |
| Space Group         | R-3 (148)                                | Ia-3 (206)                              | P43212 (6)                               | P                                          |
| a (Å)               | 5.033 Å                                  | 8.144 Å                                 | 8.34 Å                                   | 8.44 Å                                     |
| b (Å)               | 5.033 Å                                  | 8.144 Å                                 | 8.34 Å                                   | 10.21 Å                                    |
| c (Å)               | 13.74 Å                                  | 8.144 Å                                 | 25.02 Å                                  | 12.97 Å                                    |
| V (Å <sup>3</sup> ) | 301.37 Å <sup>3</sup>                    | 415.82 Å <sup>3</sup>                   | 1740.28 Å <sup>3</sup>                   | 1112.82 Å <sup>3</sup>                     |

**Table S1.** The crystallographic parameter for (a)  $\alpha$ -Fe<sub>2</sub>O<sub>3</sub> (ICDD No. 04-006-6579) (b)  $\beta$ -Fe<sub>2</sub>O<sub>3</sub> (ICDD No. 00-039-0238) (c)  $\gamma$ -Fe<sub>2</sub>O<sub>3</sub> (ICDD No. 00-025-1402) and (d)  $\epsilon$ -Fe<sub>2</sub>O<sub>3</sub> (ICDD No. 00-016-0653)

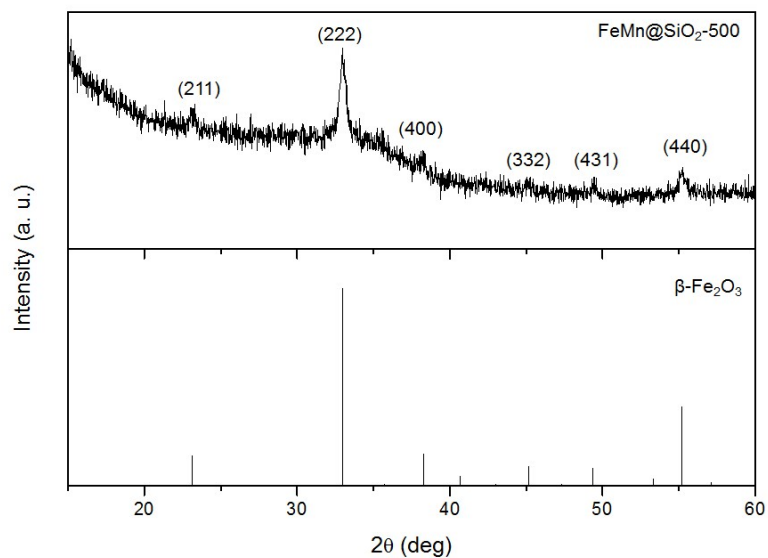

**Fig. S4.** XRD pattern of FeMn@SiO<sub>2</sub>-500

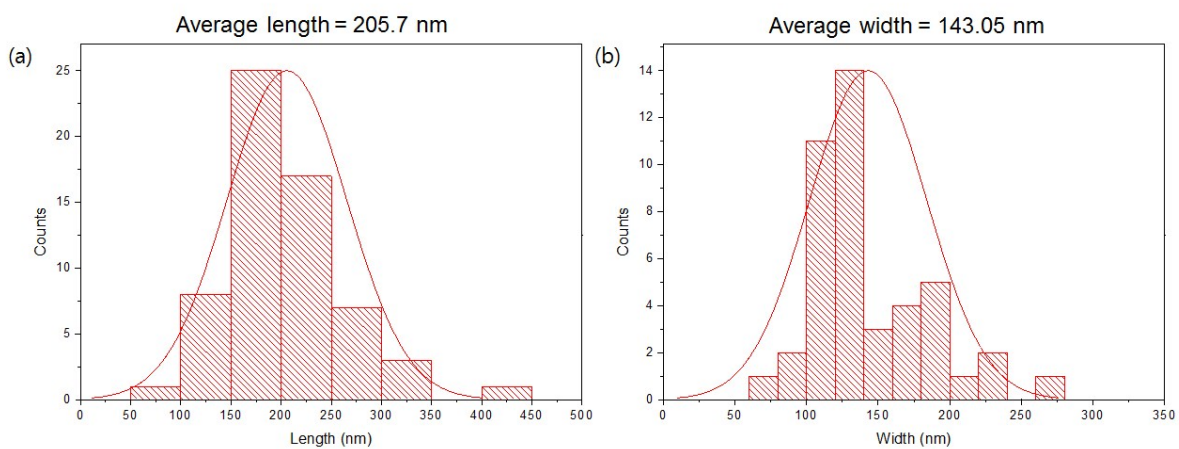

**Fig. S5.** (a) The average length and (b) the average width of FeMn@SiO<sub>2</sub>-500 particles

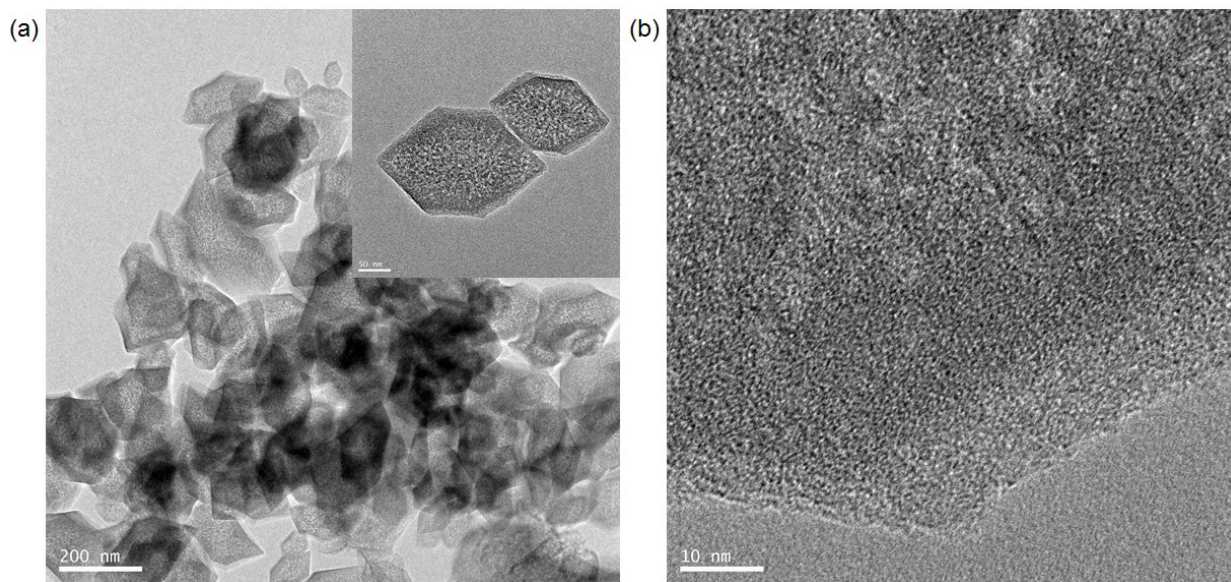

**Fig. S6.** (a) TEM and (b) HRTEM images of Fe/Mn removed FeMn@SiO<sub>2</sub>-500

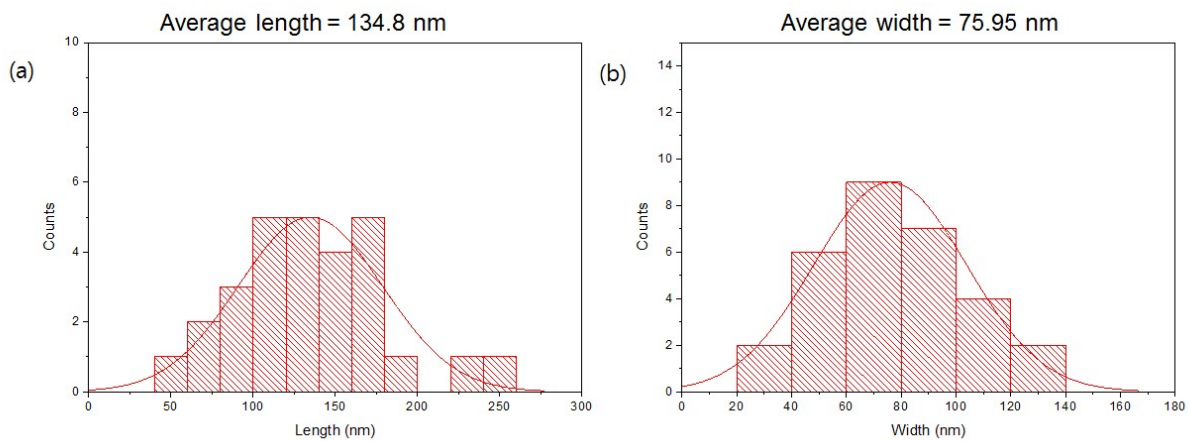

**Fig. S7.** (a) The average length and (b) the average width of void space of FeMn@SiO<sub>2</sub>-500 particles

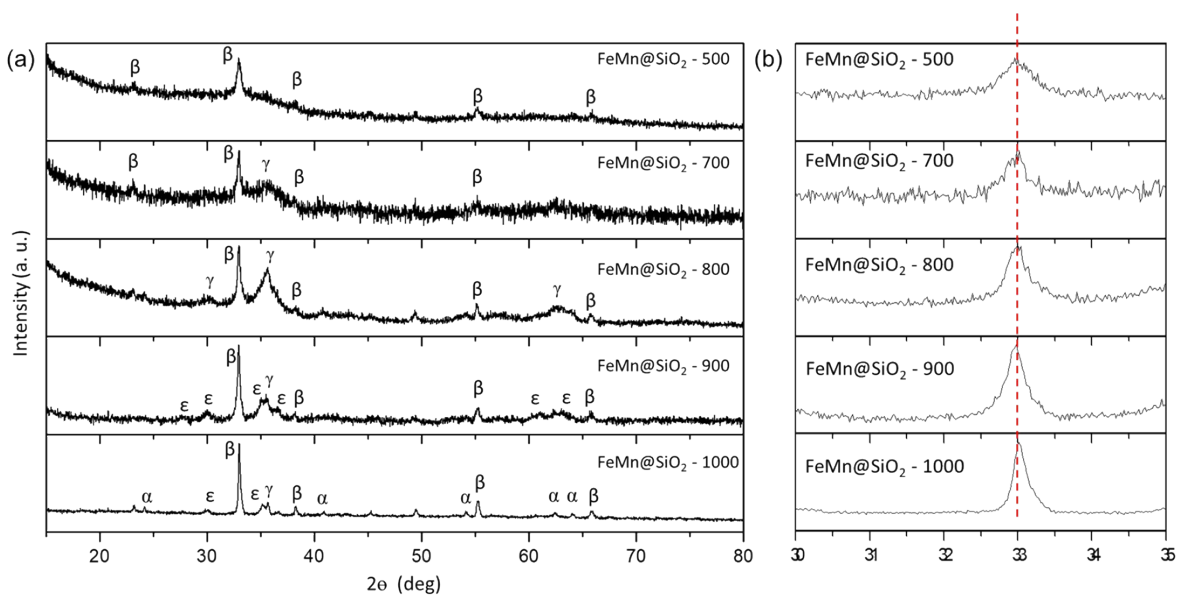

**Fig. S8.** Powder X-ray diffraction patterns of  $\text{SiO}_2$  coated Mn-doped iron oxides structures annealed at 500, 700, 800, 900, and 1000 °C for 30 min.

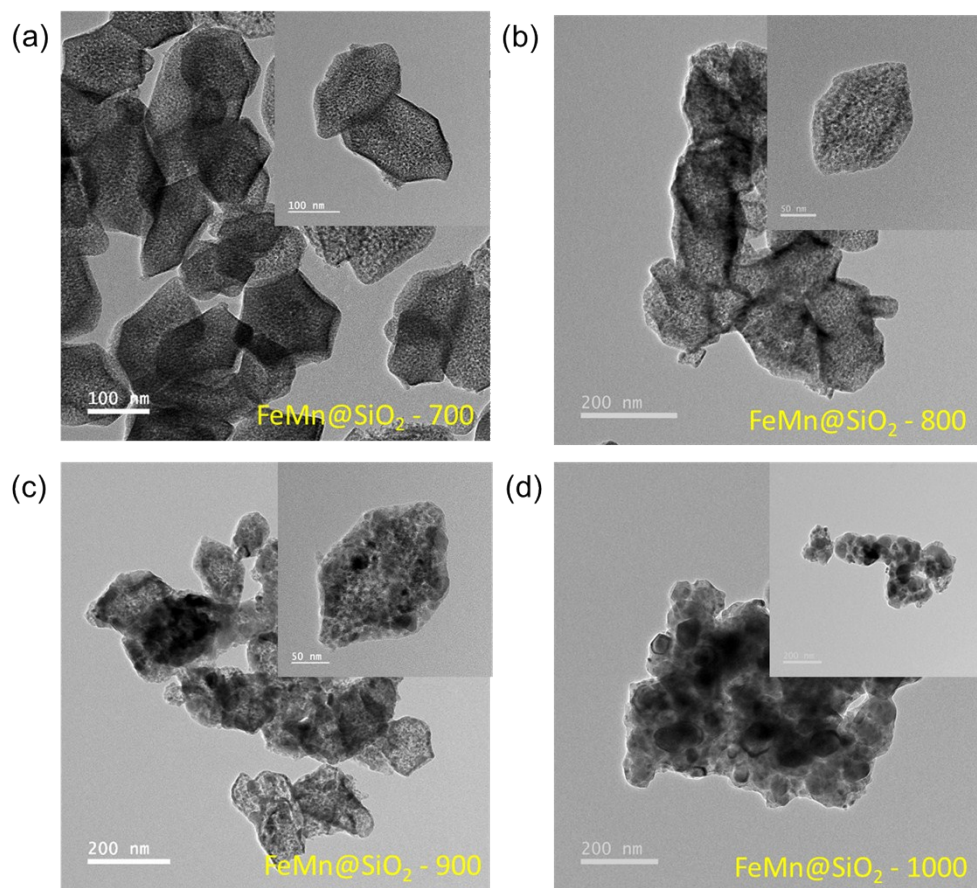

**Fig. S9.** TEM images of (a) FeMn@SiO<sub>2</sub> - 700 (b) FeMn@SiO<sub>2</sub> - 800 (c) FeMn@SiO<sub>2</sub> - 900 (d) FeMn@SiO<sub>2</sub> - 1000



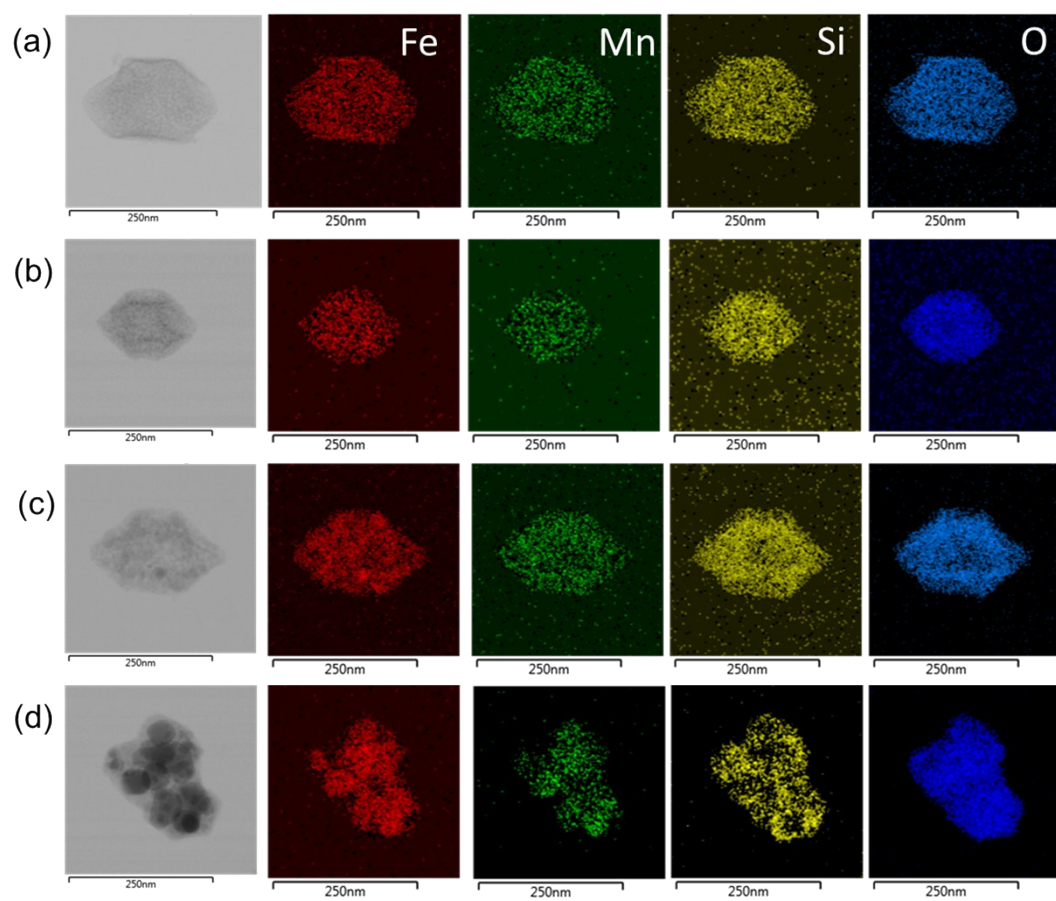

**Fig. S10.** Energy dispersive X-ray spectroscopy (EDS) mapping of (a) FeMn@SiO<sub>2</sub>-700 (b) FeMn@SiO<sub>2</sub>-800 (c) FeMn@SiO<sub>2</sub>-900 (d) FeMn@SiO<sub>2</sub>-1000

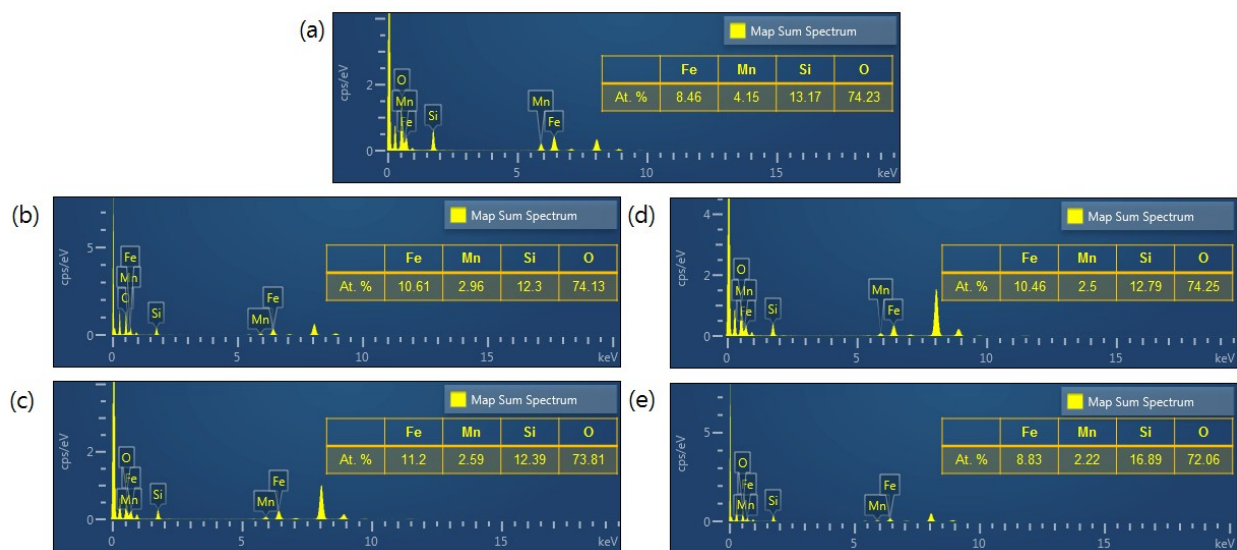

**Fig. S11.** EDS spectra of (a) FeMn@SiO<sub>2</sub>-500 (b) FeMn@SiO<sub>2</sub>-700 (c) FeMn@SiO<sub>2</sub>-500 (d) FeMn@SiO<sub>2</sub>-900 and (e) FeMn@SiO<sub>2</sub>-1000

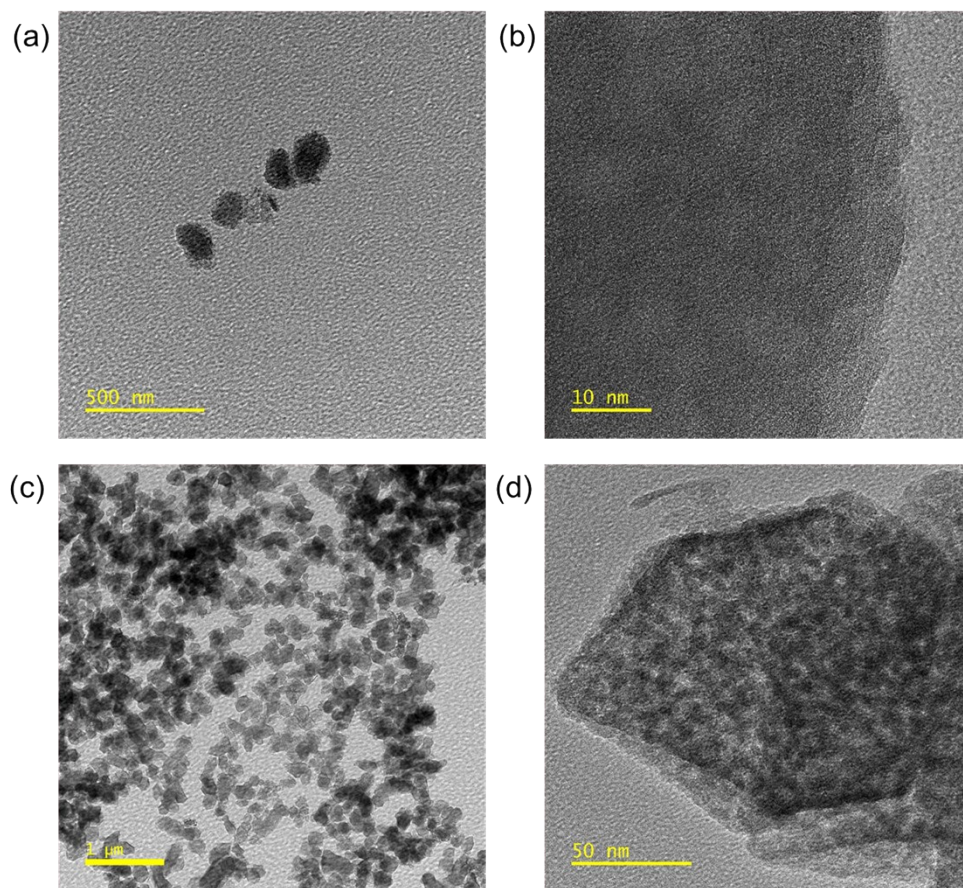

**Fig. S12.** (a,b) TEM images of SiO<sub>2</sub> removed FeMn@SiO<sub>2</sub>-500 particles and (c,d) NH<sub>4</sub>OH-FeMn-500

| Compound                                                                   | Average Peak Position (eV) |                      |
|----------------------------------------------------------------------------|----------------------------|----------------------|
|                                                                            | Fe 2p <sub>1/2</sub>       | Fe 2p <sub>3/2</sub> |
| Fe <sub>2</sub> O <sub>3</sub> (Fe <sup>3+</sup> )                         | 724.6                      | 711.0                |
| Fe <sub>2</sub> SiO <sub>4</sub> (Fe <sup>2+</sup> )                       | 722.6                      | 709.0                |
| Fe <sub>3</sub> O <sub>4</sub><br>(Fe <sup>2+</sup> and Fe <sup>3+</sup> ) | 724.07                     | 710.56               |

**Table S2.** Average peak positions of the XPS for Fe<sub>2</sub>O<sub>3</sub> (Fe<sup>3+</sup>), Fe<sub>2</sub>SiO<sub>4</sub> (Fe<sup>2+</sup>), and Fe<sub>3</sub>O<sub>4</sub> (Fe<sup>2+</sup> and Fe<sup>3+</sup>)<sup>2</sup>

#### References

1. J. Lee, S. Y. Kwak, *ACS Omega* 2018, **3**, 2634.
2. T. Yamashita, P. Hayes, Analysis of XPS spectra of Fe<sup>2+</sup> and Fe<sup>3+</sup> ions in oxide materials. *Applied Surface Science* 2008, **254**, 2441-2449
